# Supplementary material
Source: publisher figshare collection journal article supplement (https://sage.figshare.com/ndownloader/files/20609967)
Supplement: Supplementary file 1 [file 20609967]

| <b>Demographic Variables</b>                    | <b>Description</b>                             |
|-------------------------------------------------|------------------------------------------------|
| RIAGENDR                                        | Gender                                         |
| RIDAGEYR                                        | Age at screening                               |
| RIDRETH3                                        | Race                                           |
| DMDEDUC2                                        | Education level - Adults 20+                   |
| INDHHIN2                                        | Annual household income                        |
|                                                 |                                                |
| <b>Subjective Smell and Taste Variables</b>     |                                                |
| CSQ010                                          | Had a problem with smell in the past 12 months |
|                                                 |                                                |
| <b>Objective Smell and Taste Variables</b>      |                                                |
| CSSEXSTS                                        | Overall taste and smell exam status            |
| CSXQUIPT                                        | Tongue Tip 1mM Quinine                         |
| CSXNAPT                                         | Tongue Tip 1M NaCl                             |
| CSXQUIST                                        | Whole Mouth 1 mM Quinine                       |
| CSXSLTST                                        | Whole Mouth 1 M NaCl                           |
| CSXCHOOD                                        | Smell Test: Chocolate Scent                    |
| CSXSBOD                                         | Smell Test: Strawberry Scent                   |
| CSXSMKOD                                        | Smell Test: Smoke Scent                        |
| CSXLEAOD                                        | Smell Test: Leather Scent                      |
| CSXSOAOD                                        | Smell Test: Soap Scent                         |
| CSXGRAOD                                        | Smell Test: Grape Scent                        |
| CSXONOD                                         | Smell Test: Onion Scent                        |
| CSXNGSOD                                        | Smell Test: Natural Gas Scent                  |
|                                                 |                                                |
| <b>Depression Variables (PHQ Questionnaire)</b> |                                                |
| DPQ010                                          | Have little interest in doing things           |
| DPQ020                                          | Feeling down, depressed, or hopeless           |
| DPQ030                                          | Trouble sleeping or sleeping too much          |
| DPQ040                                          | Feeling tired or having little energy          |
| DPQ050                                          | Poor appetite or overeating                    |
| DPQ060                                          | Feeling bad about yourself                     |
| DPQ070                                          | Trouble concentrating on things                |
| DPQ080                                          | Moving or speaking slowly or too fast          |
| DPQ090                                          | Thought you would be better off dead           |
| DPQ100                                          | Difficulty these problems have caused          |
